# Supplementary material
Source: PubMed Central journal article supplement (PMC3140541)
Supplement: NIHMS306093-supplement-1_si_001.pdf [file NIHMS306093-supplement-1_si_001.pdf]

Fig. 1.  $^1\text{H}$  NMR spectrum of compound **1**  
Fig. 2.  $^{13}\text{C}$  NMR spectrum of compound **1**  
Fig. 3.  $^1\text{H}$ - $^1\text{H}$  COSY spectrum of compound **1**  
Fig. 4.. HSQC spectrum of compound **1**  
Fig. 5. HMBC spectrum of compound **1**  
Fig. 6. NOESY spectrum of compound **1**  
Fig. 7. (+) HRESIMS spectrum of compound **1**  
Fig. 8.  $^1\text{H}$  NMR spectrum of compound **2**  
Fig. 9.  $^{13}\text{C}$  NMR spectrum of compound **2**  
Fig. 10.  $^1\text{H}$ - $^1\text{H}$  COSY spectrum of compound **2**  
Fig. 11. HSQC spectrum of compound **2**  
Fig. 12. HMBC spectrum of compound **2**  
Fig. 13. (+) HRESIMS spectrum of compound **2**  
Fig. 14.  $^1\text{H}$  NMR spectrum of compound **3**  
Fig. 15.  $^{13}\text{C}$  NMR spectrum of compound **3**  
Fig. 16.  $^1\text{H}$ - $^1\text{H}$  COSY spectrum of compound **3**  
Fig. 17. HMBC spectrum of compound **3**  
Fig. 18. (+) HRESIMS spectrum of compound **3**  
Fig. 19.  $^1\text{H}$  NMR spectrum of compound **18**  
Fig. 20.  $^{13}\text{C}$  NMR spectrum of compound **18**  
Fig. 21. (-) HRESIMS spectrum of compound **18**

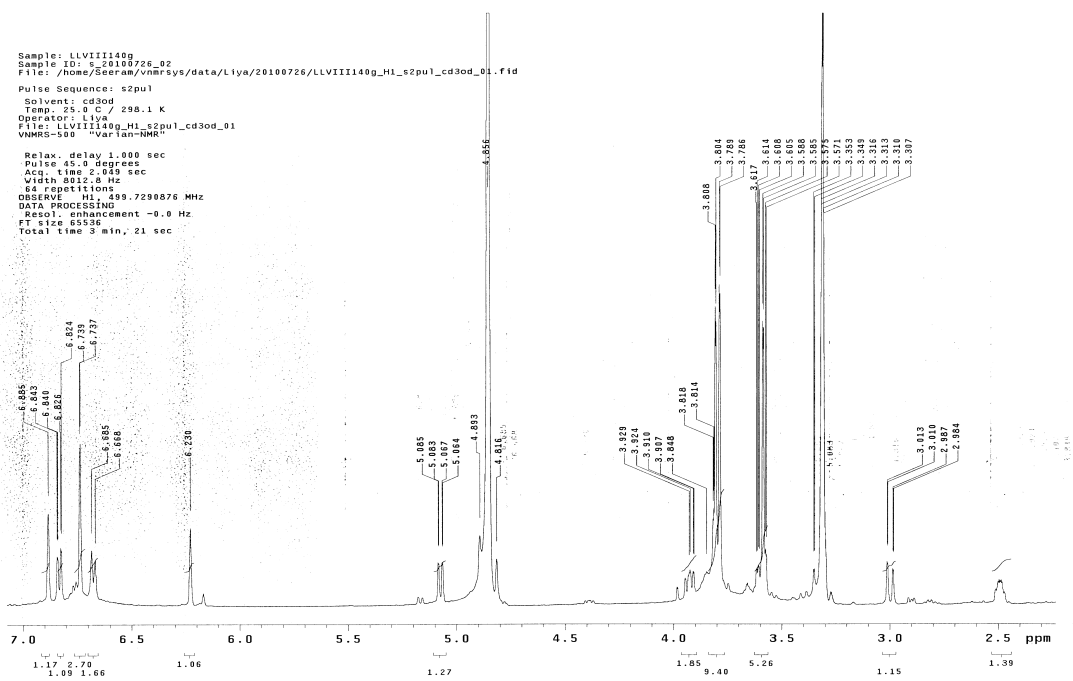

Fig. 1.  $^1\text{H}$  NMR spectrum of compound 1

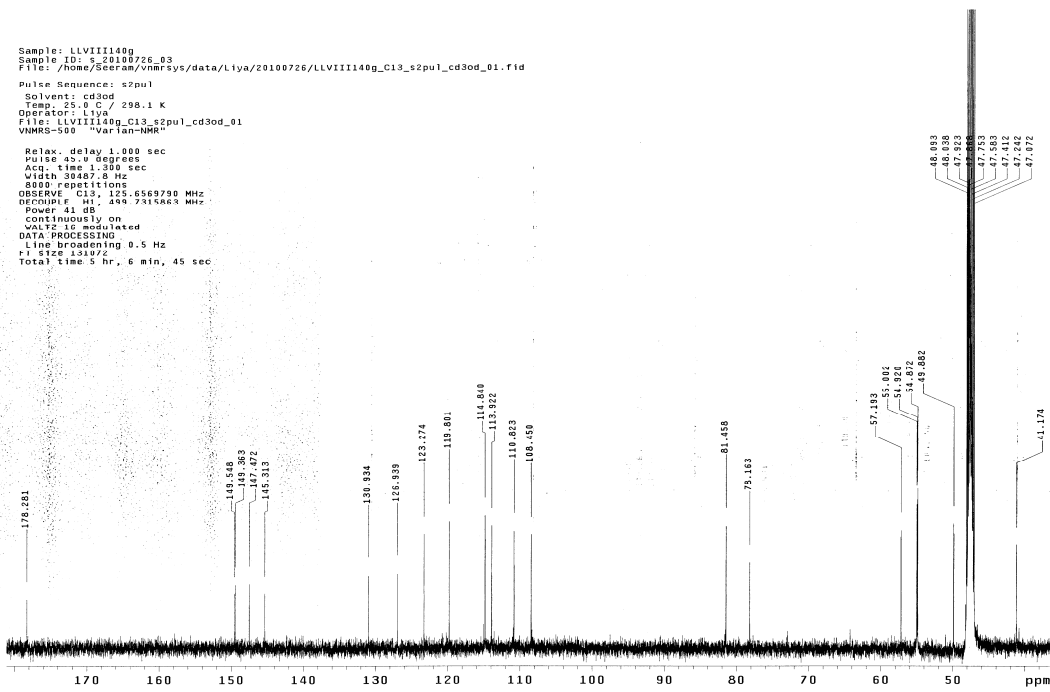

Fig. 2.  $^{13}\text{C}$  NMR spectrum of compound 1

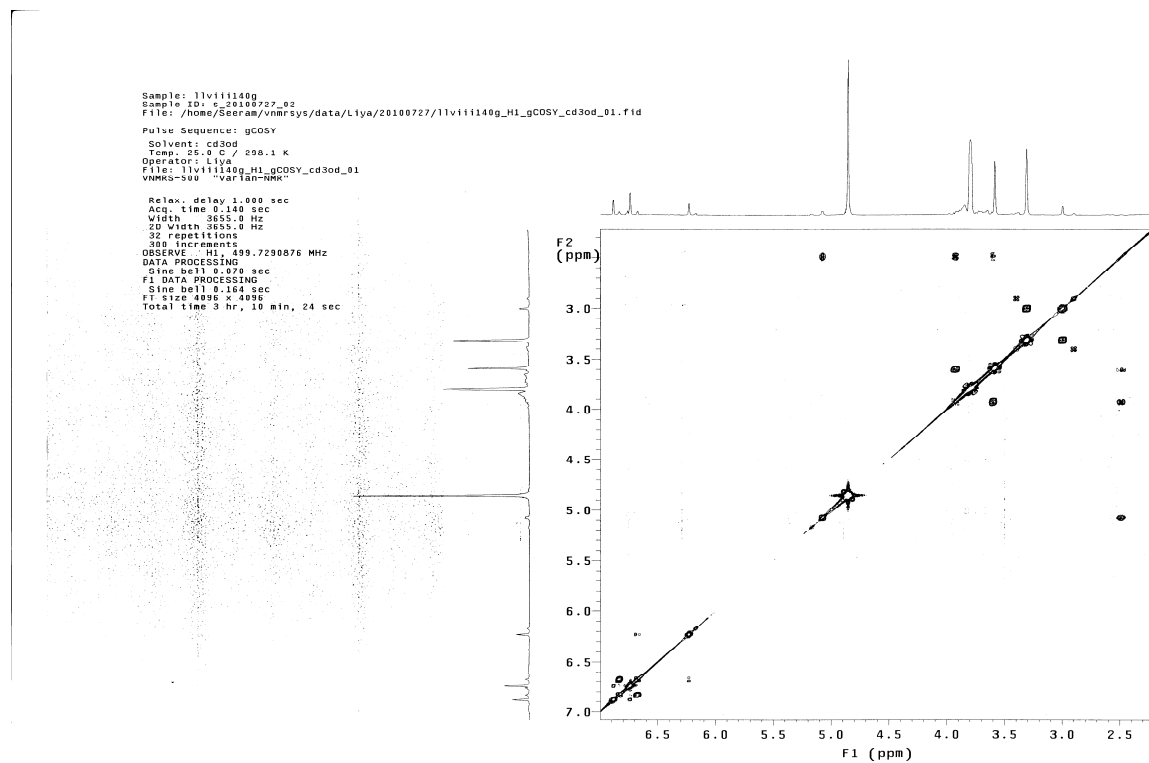

Fig. 3.  $^1\text{H}$ - $^1\text{H}$  COSY spectrum of compound **1**

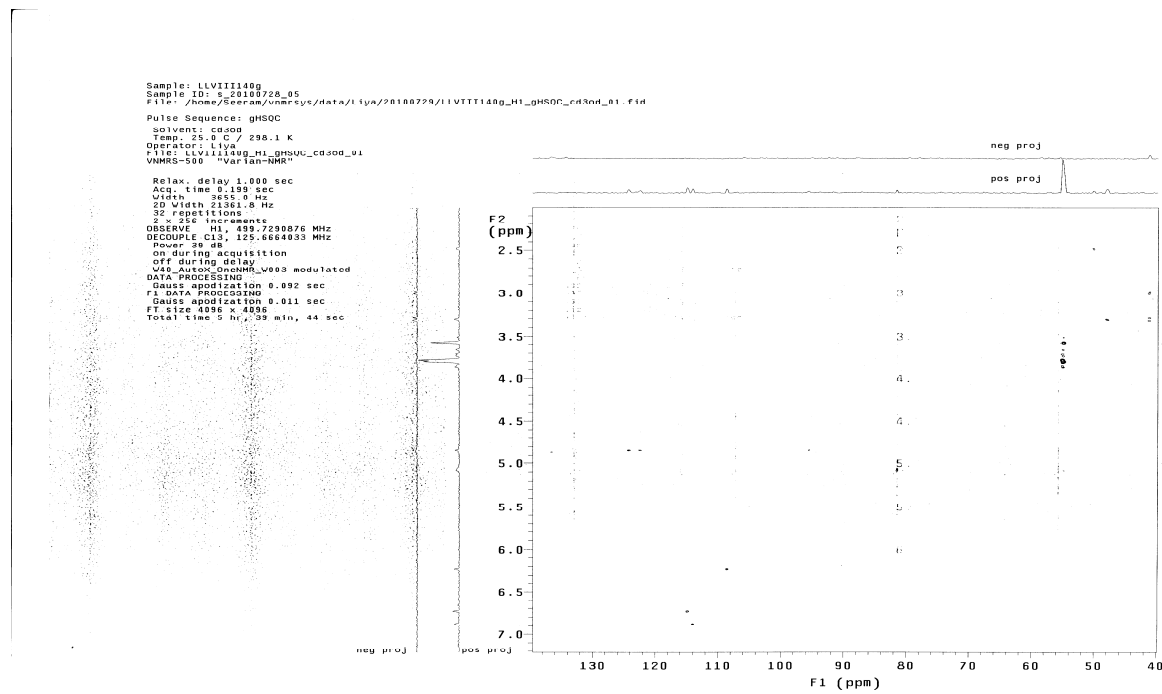

Fig. 4. HSQC spectrum of compound **1**

Sample: LLVIII140g  
 Sample ID: 5\_20100728\_04  
 File: /home/Service/omr/sys/data/LIya/20100728/LLVIII140g\_H1\_gHMBC\_cd30d\_01.FID  
 Pulse Sequence: gHMBC  
 Solvent: cd3od  
 Temp: 25.0 C / 298.1 K  
 Operator: Liya  
 File: LLVIII140g\_H1\_gHMBC\_cd30d\_01  
 VMMS-510 "Varian-VMS"  
 Relax delay 1.000 sec  
 Mixing 0.050 sec  
 Acq. Time 0.120 sec  
 Width 3655.0 Hz  
 F0 width 2014.4 Hz  
 32 repetitions  
 SIZ increments  
 OBSERVE F1 400.720076 MHz  
 DATA PROCESSING  
 Sine bell 0.064 sec  
 Sine bell 0.017 sec  
 FT size 2048 x 4096  
 Total Time 5. hr, 31 min, 23 sec

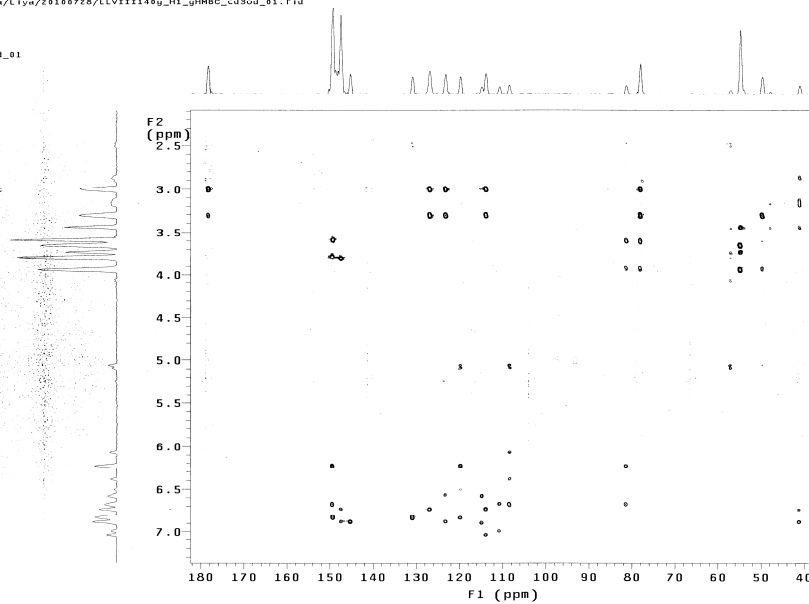

Fig. 5. HMBC spectrum of compound 1

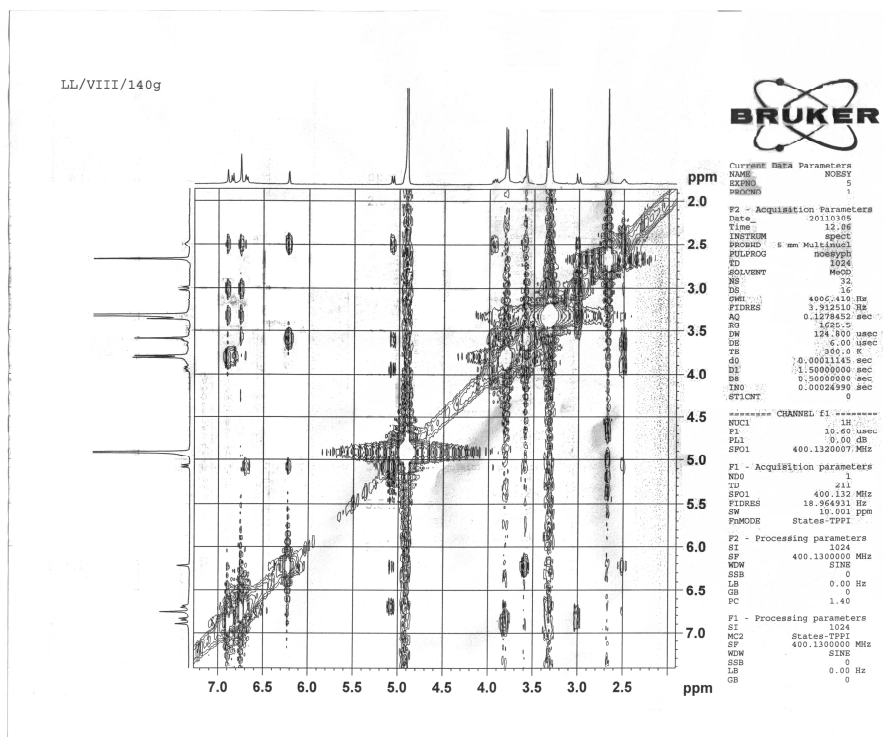

Fig. 6. NOESY spectrum of compound 1





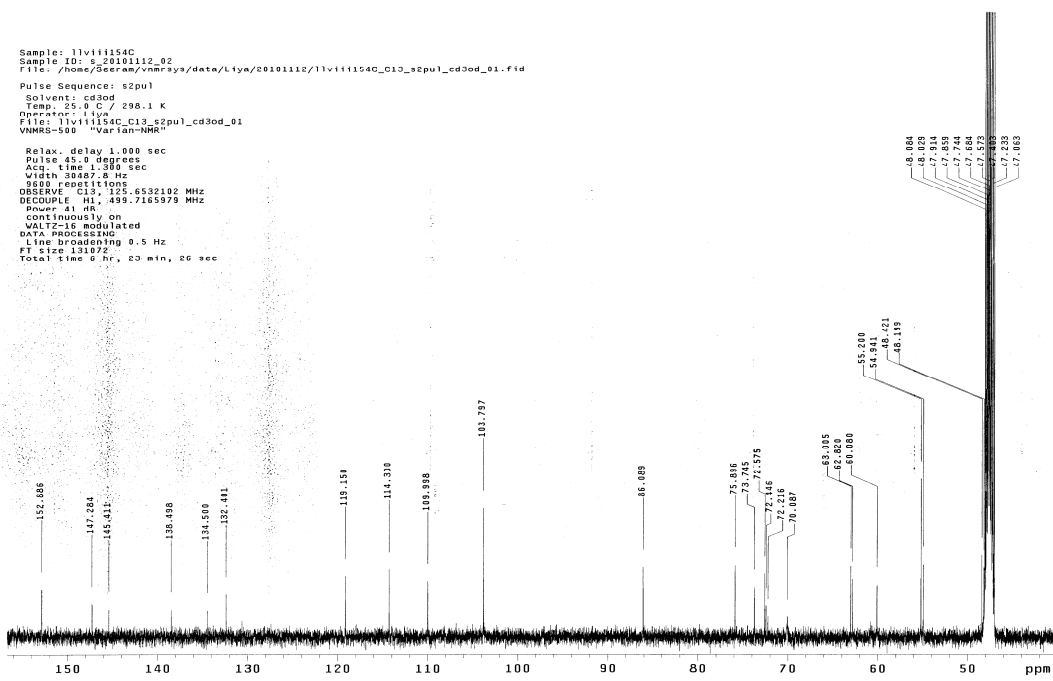

Fig. 9.  $^{13}\text{C}$  NMR spectrum of compound 2

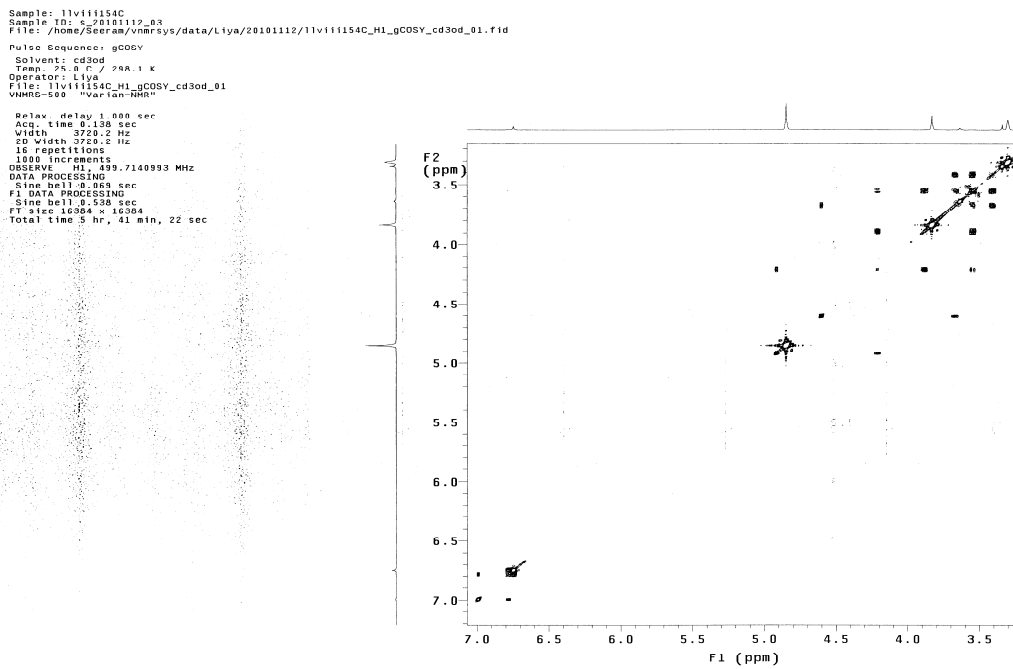

Fig. 10.  $^1\text{H}$ - $^1\text{H}$  COSY spectrum of compound 2

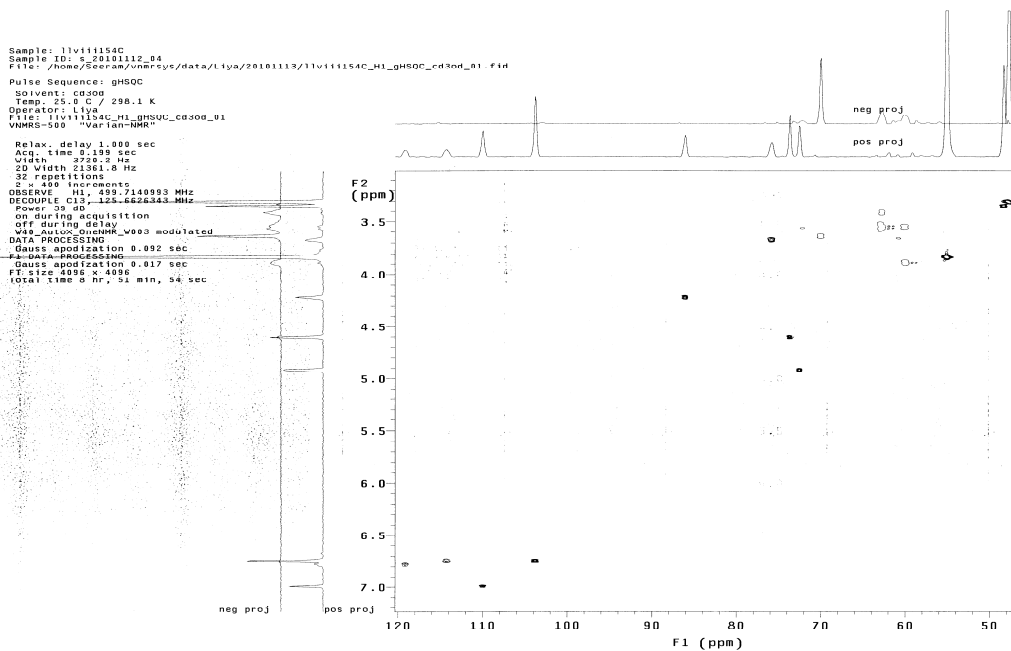

Fig. 11. HSQC spectrum of compound 2

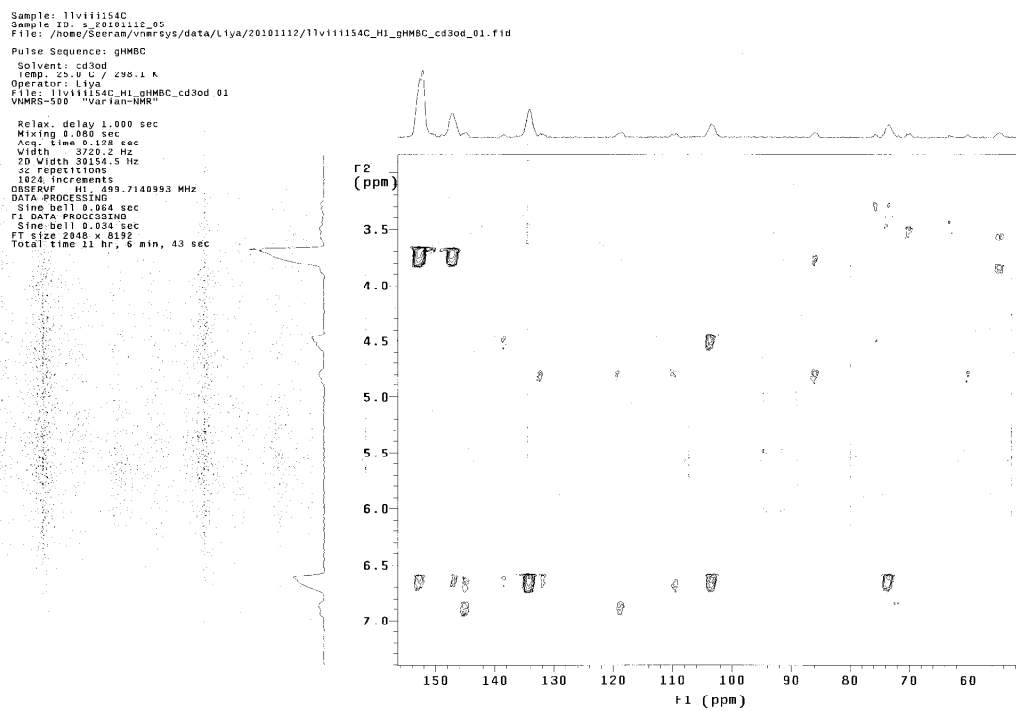

Fig. 12. HMBC spectrum of compound 2

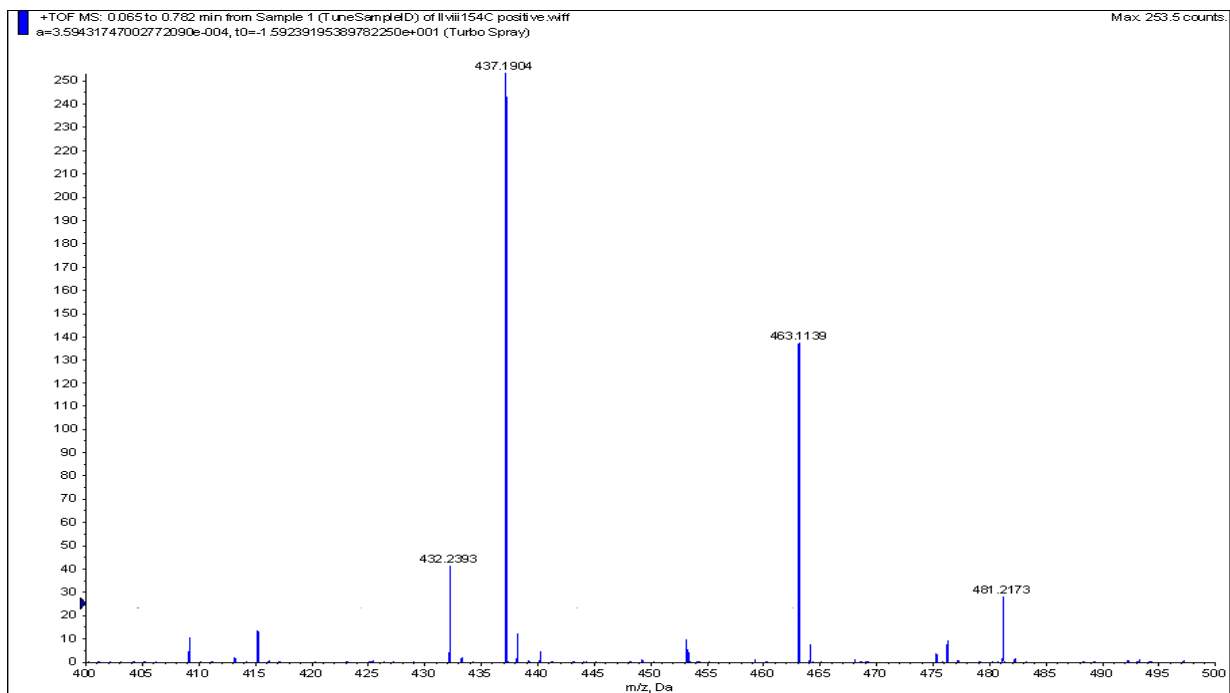

Fig. 13. (+) HRESIMS of compound 2

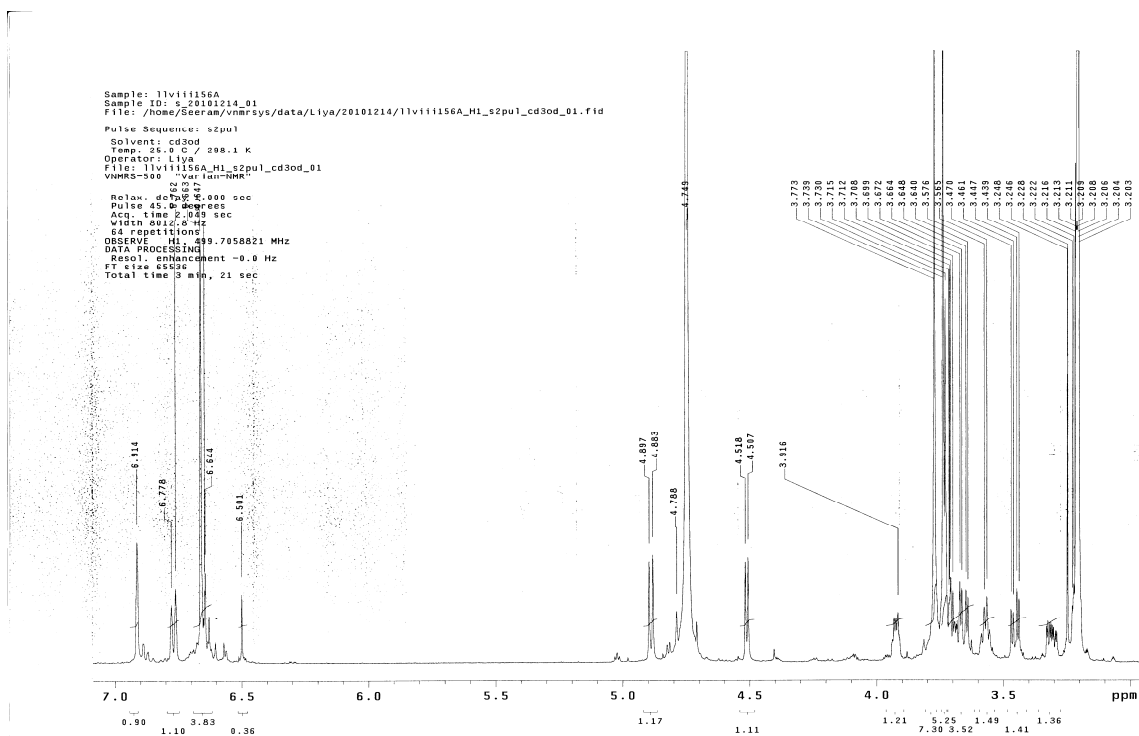

Fig. 14. <sup>1</sup>H NMR spectrum of compound 3

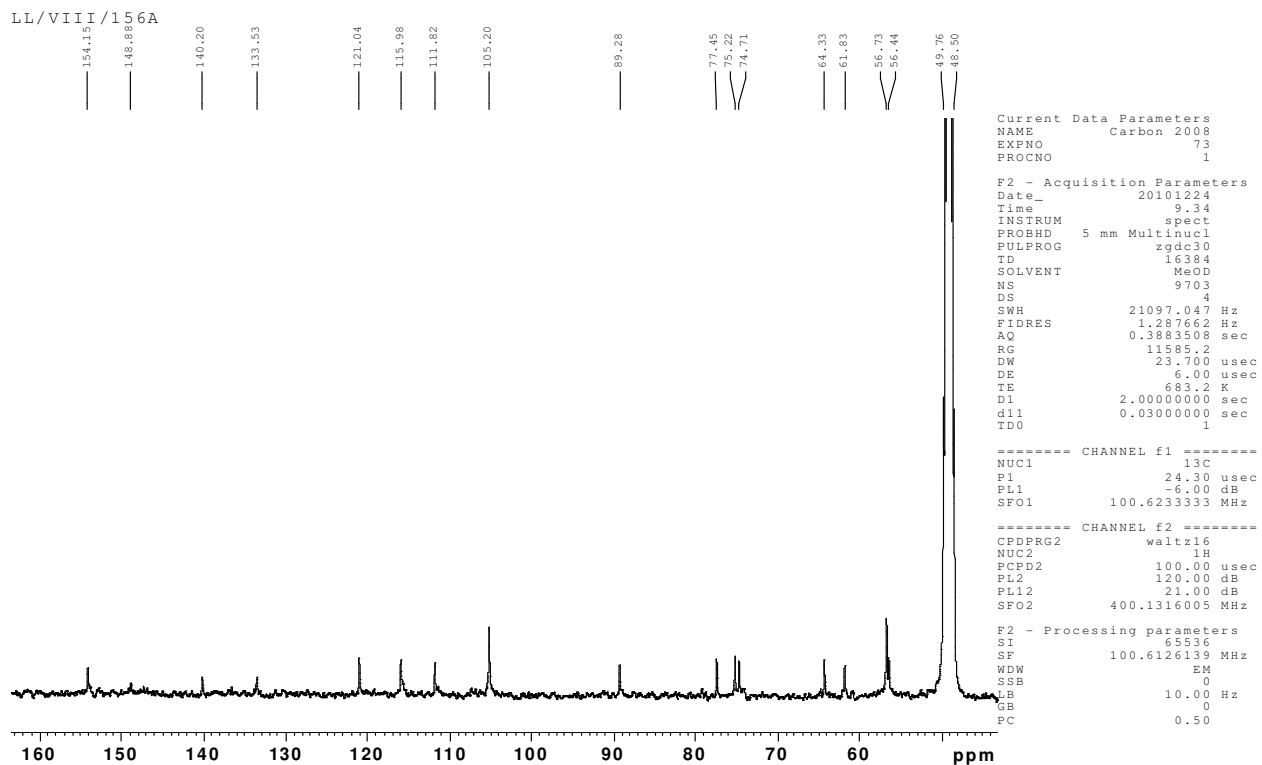

Fig. 15.  $^{13}\text{C}$  NMR spectrum of compound **3**

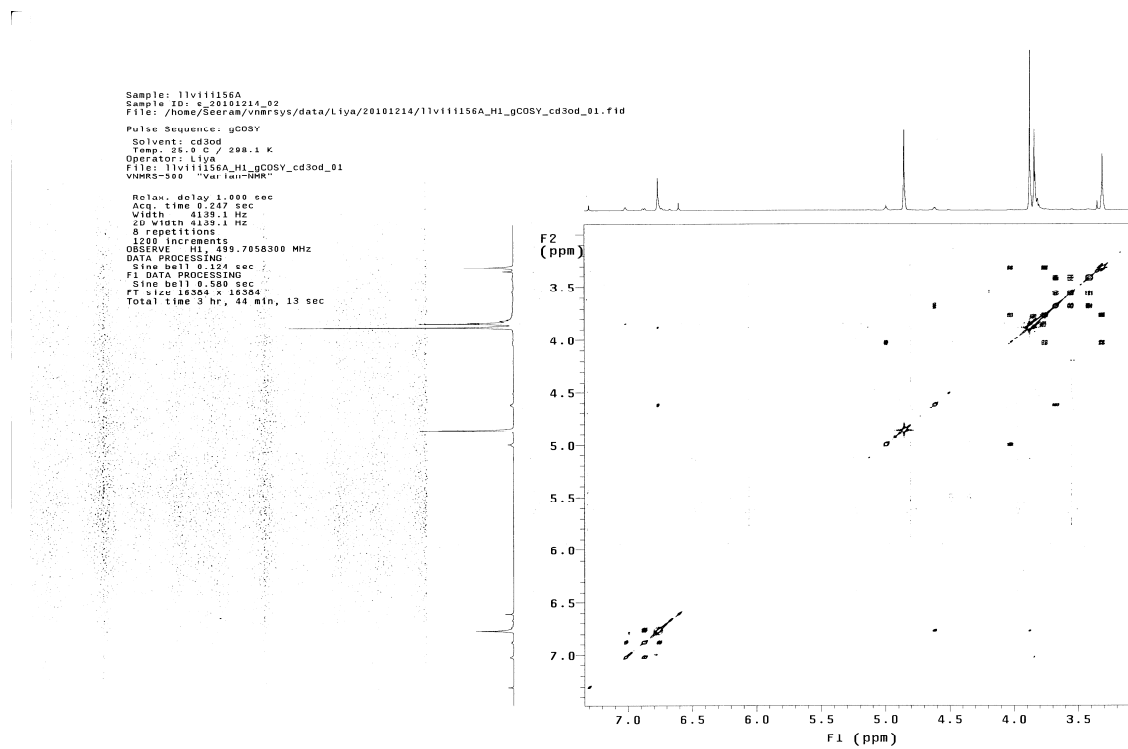

Fig. 16.  $^1\text{H}$ - $^1\text{H}$  COSY spectrum of compound **3**

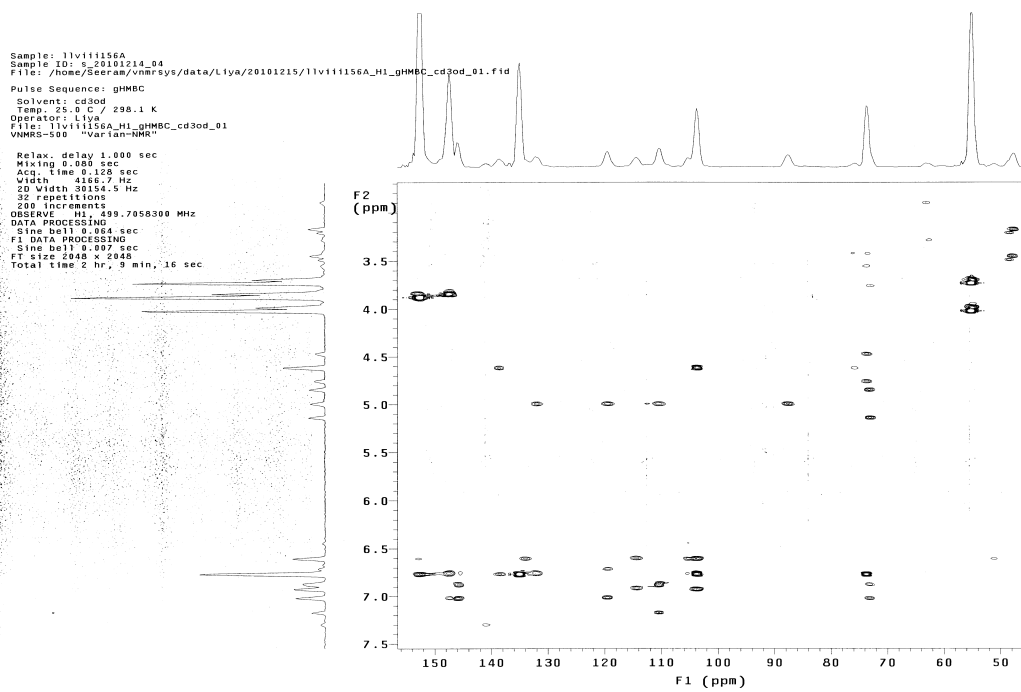

Fig. 17. HMBC spectrum of compound **3**

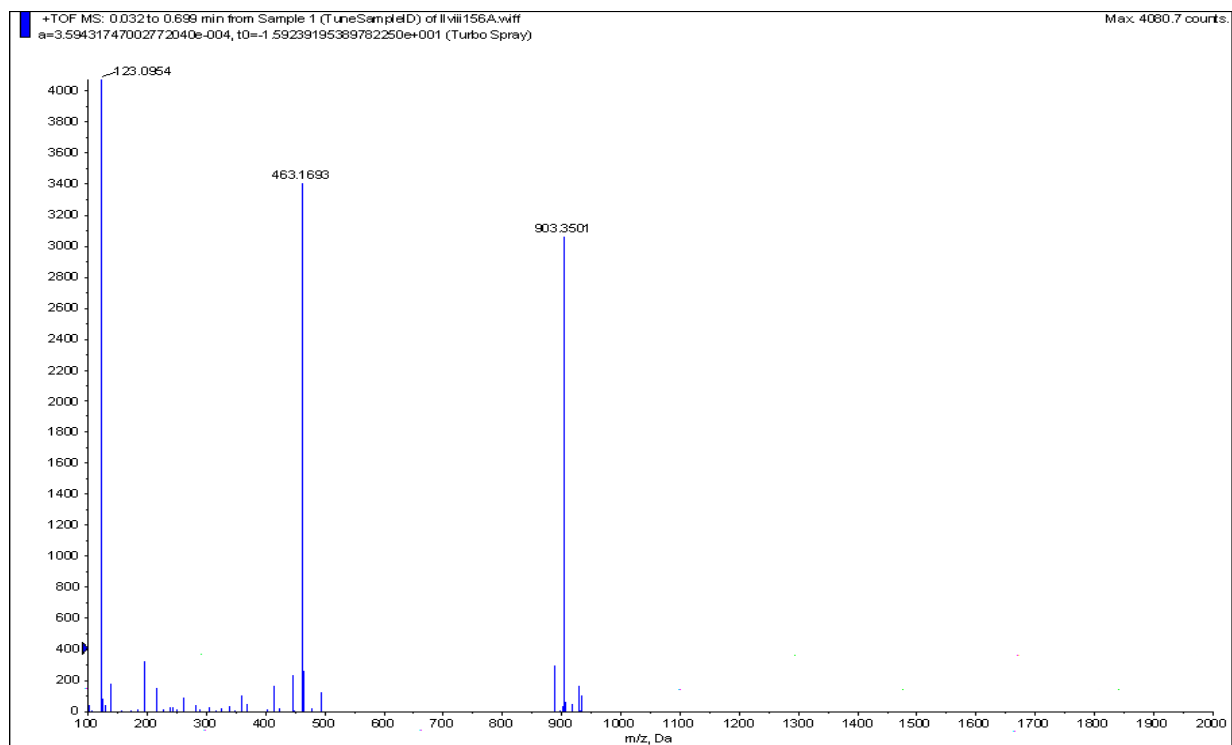

Fig. 18. (+) HRESIMS spectrum of compound **3**

LL/VIII/117G

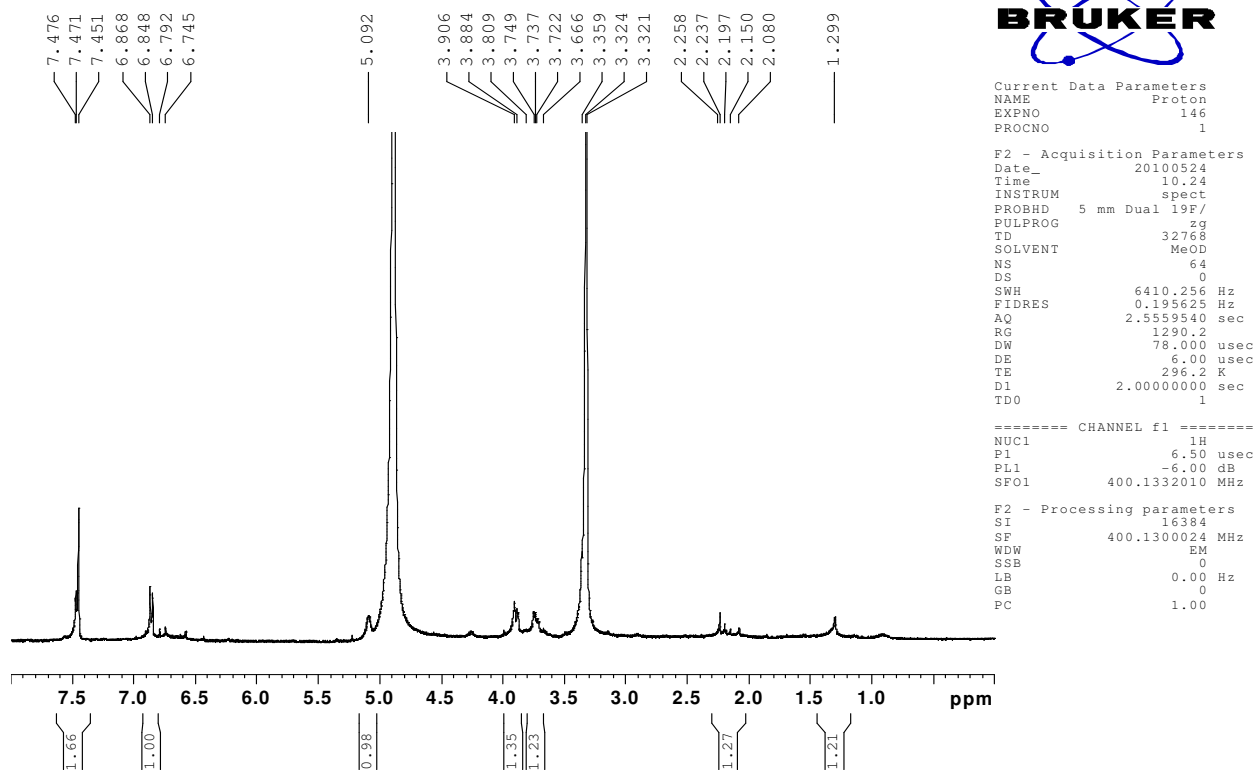

Fig. 19. <sup>1</sup>H NMR spectrum of compound 18

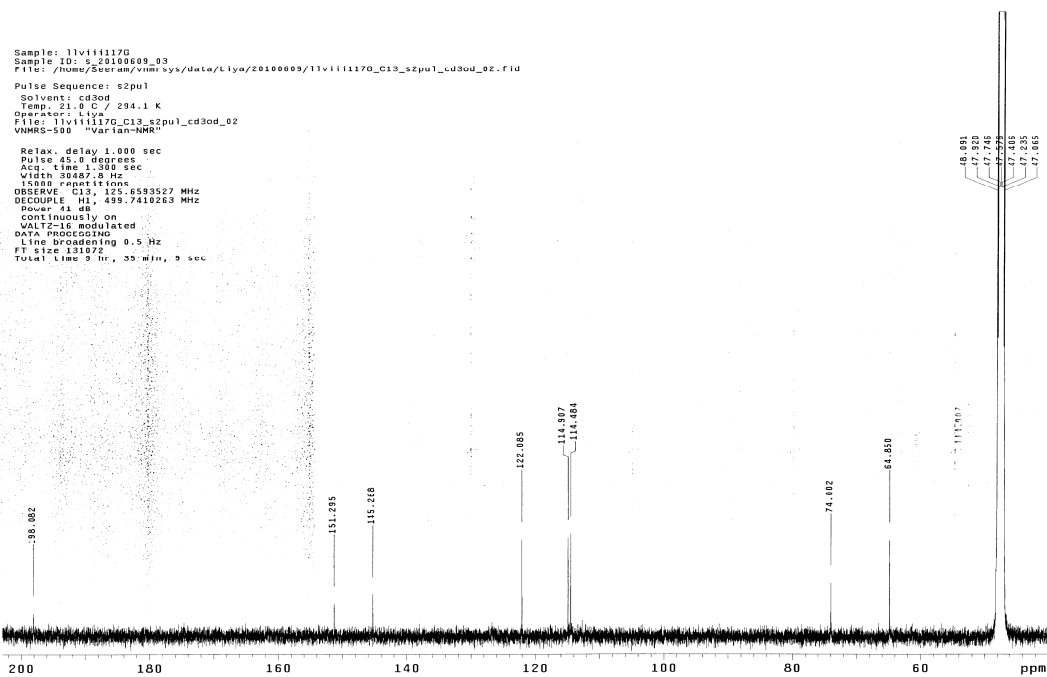

Fig. 20. <sup>13</sup>C NMR spectrum of compound 18

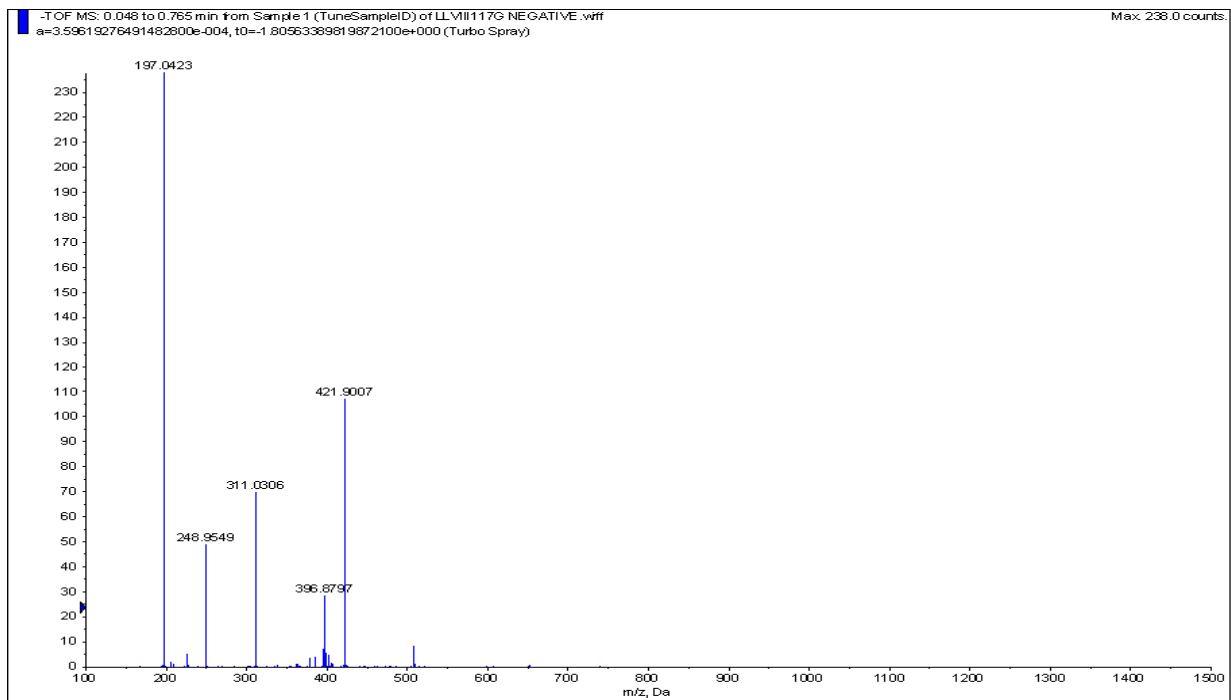

Fig. 21. (-) HRESIMS spectrum of compound **18**
